# Supplementary material
Source: Frontiers journal article supplement (https://www.frontiersin.org/articles/339908)
Supplement: Image_1.PDF [file Image_1.PDF]

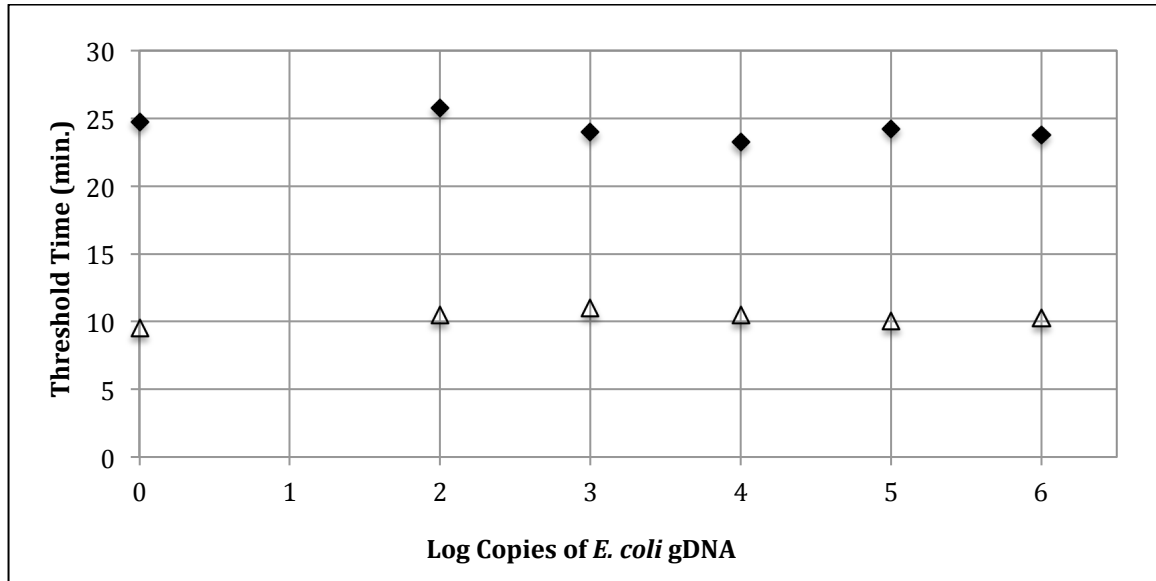

**Figure S1.** Real-time RPA reactions run with unprocessed RPA reagents, 10-fold dilutions of *E. coli* gDNA (ATCC 35218), and newly designed (Primer Set 1) or previously reported (Primer Set 2) bacteria specific primer pairs. Data points in series 1 represent reactions run with Primer Set 1 (Δ) and only shows a 90 sec standard deviation in threshold time (range: 9.5 – 11 min; n=1). Data series 2 represents reactions run with Primer Set 2 (u) and has a standard deviation of 150 sec in threshold time (range: 23.25 min – 25.75 min; n=1).
