# Supplementary material
Source: Frontiers journal article supplement (https://www.frontiersin.org/articles/339908)
Supplement: Image_2.PDF [file Image_2.PDF]

Results of restriction analysis: My working sequence (330 bp)  
Enzyme set: my\_working\_set Cut frequency: 1 - 2  
Sequence covered from bp 0 to 329  
Minimum length of open reading frames: 200

```
0   CCGTGTCTCAGTTCAGTGTGGCTGGTCATCCTCTCAGACCAGCTAGGATCGTCGCCTA
                                     ↓ DpnI
60   GGTGAGCCGTIACCCACCTACTAGCTAATCCCATCTGGGCACATCCGATGGCAAGAGGC
120  CCTAAGGTCCCCTCTTTGGICTTGCGACGTTATGCGGTAITAGCTACCGITTCAGTAG
180  TTATCCCCCTCATCAGGCAGTTTCCCAGACATTACTCACCCGTCCGCCACTCGTCAGCG
240  AAGCAGCAAGCTGCTTCCTGTTACCGTTCGACTTGATGTGTTAGGCCTGCCGCCAGCGT
300  TCAATCTGAGCCATGATCAAACTCTTCAAT
                                     ↓ DpnI
```

**Figure S2.** *DpnI* restriction enzyme cut sites (red boxes with arrows) located within the previously sequenced amplicons generated from no-template control reactions. The image was obtained from WatCut, an online restriction analysis tool (<http://watcut.uwaterloo.ca/template.php>).
